# Supplementary material
Source: PubMed Central journal article supplement (PMC10160891)
Supplement: tpmd220342.SD1.pdf [file tpmd220342.SD1.pdf]

# Validation of test results

A

## qPCR results of *P. falciparum*-positive and negative RDTs DNA from the field

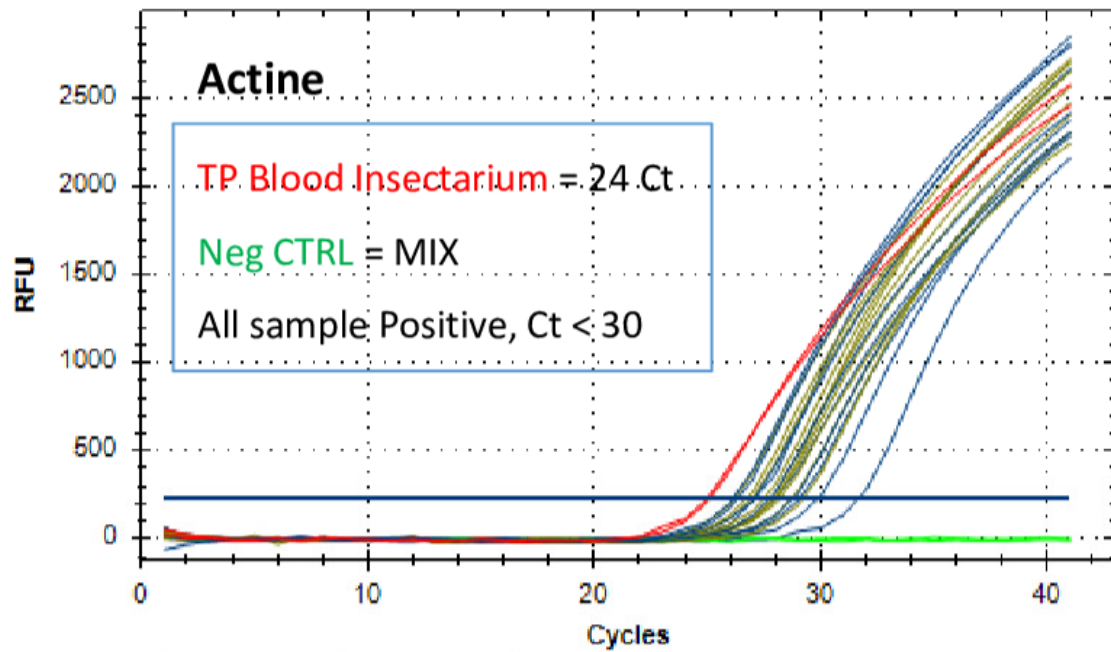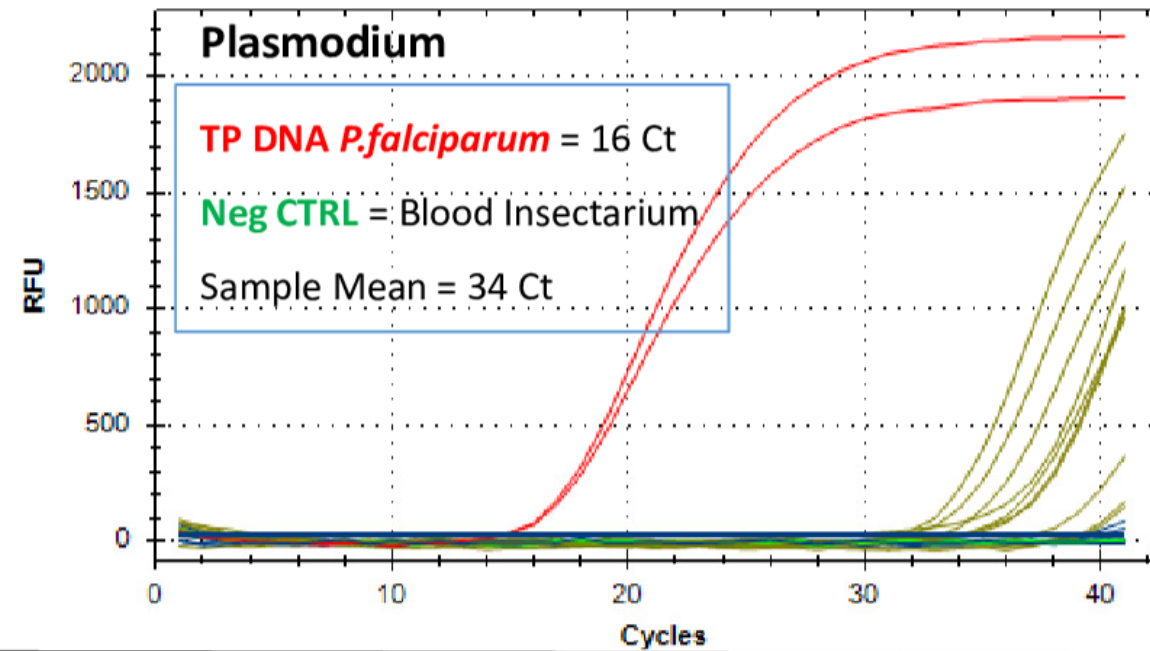

### Legend

- Blue curve : 10 RDTs Pf. Negative
- Green curve : 10 RDTs Pf. Positive
- Red curve : Positive control (TP)
- Light green line : Negative control (Neg CTRL)

## qPCR results of blank *Plasmodium* RDTs DNA tested with *Borrelia*-positive and negative blood samples

B

### Quantification of the mixture of *Borrelia* culture strains with blood

### Dissection of the different parts of *P.falciparum* RDTs

### Choice of the parts of *P.falciparum* RDTs according to bacterial load

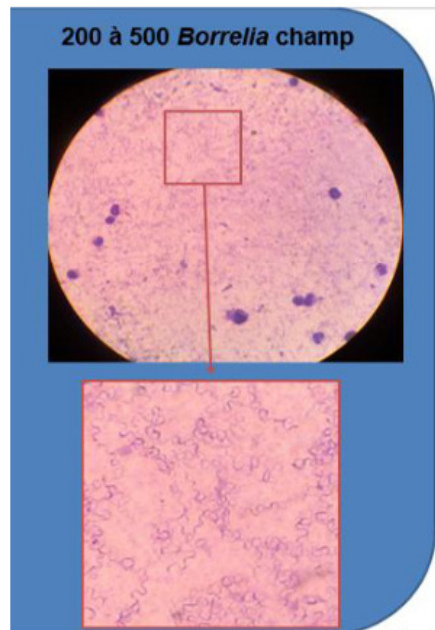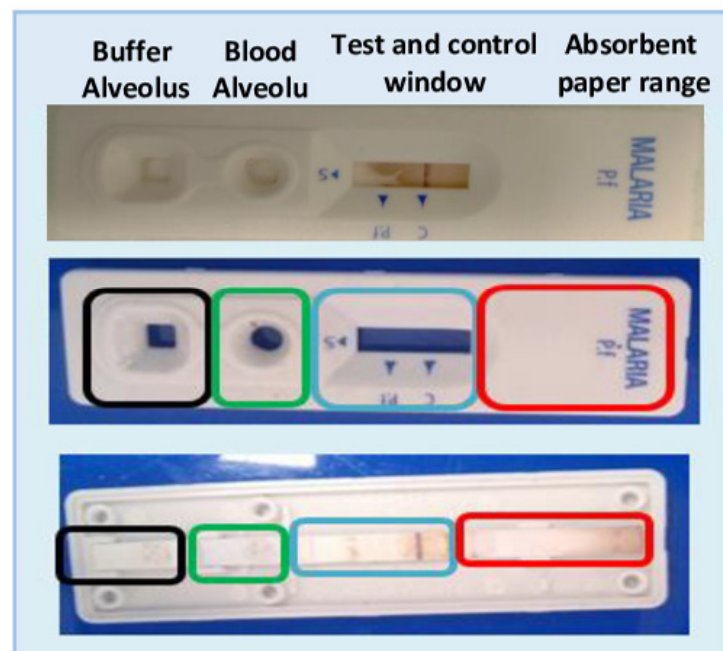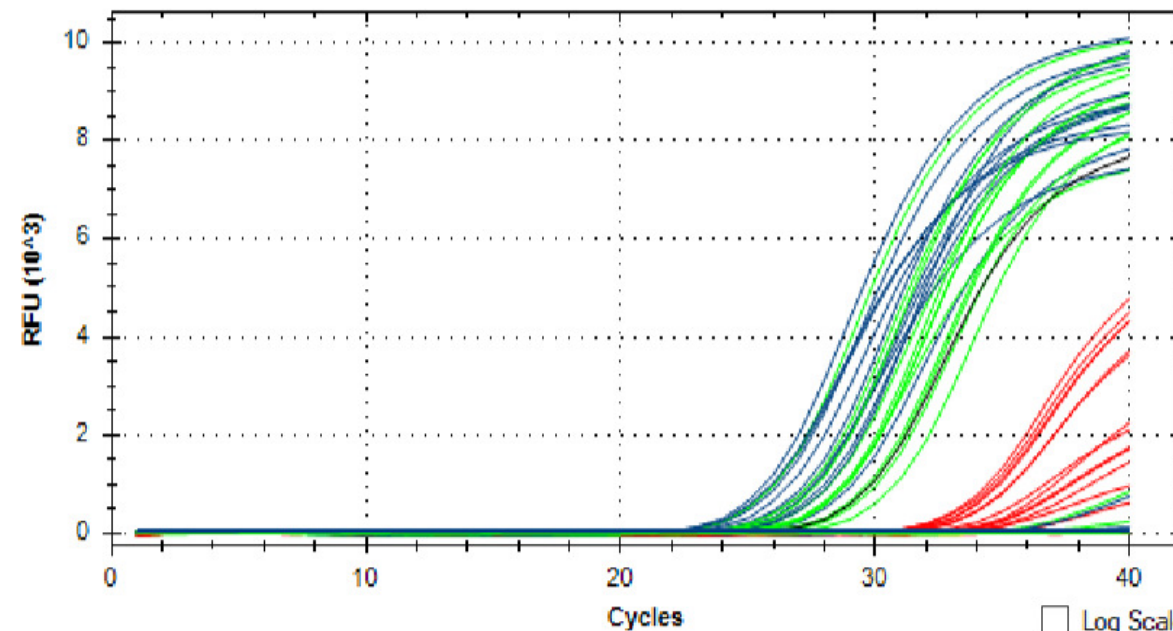

### Legend

- Blue curve : Membrane development
- Green curve : Blood deposit range
- Red curve : Absorbent paper range
- Samples : 25 RDTs Pf. positive *Borrelia*
- Control : 10 RDTs Pf. negative *Borrelia*

Map of Senegal

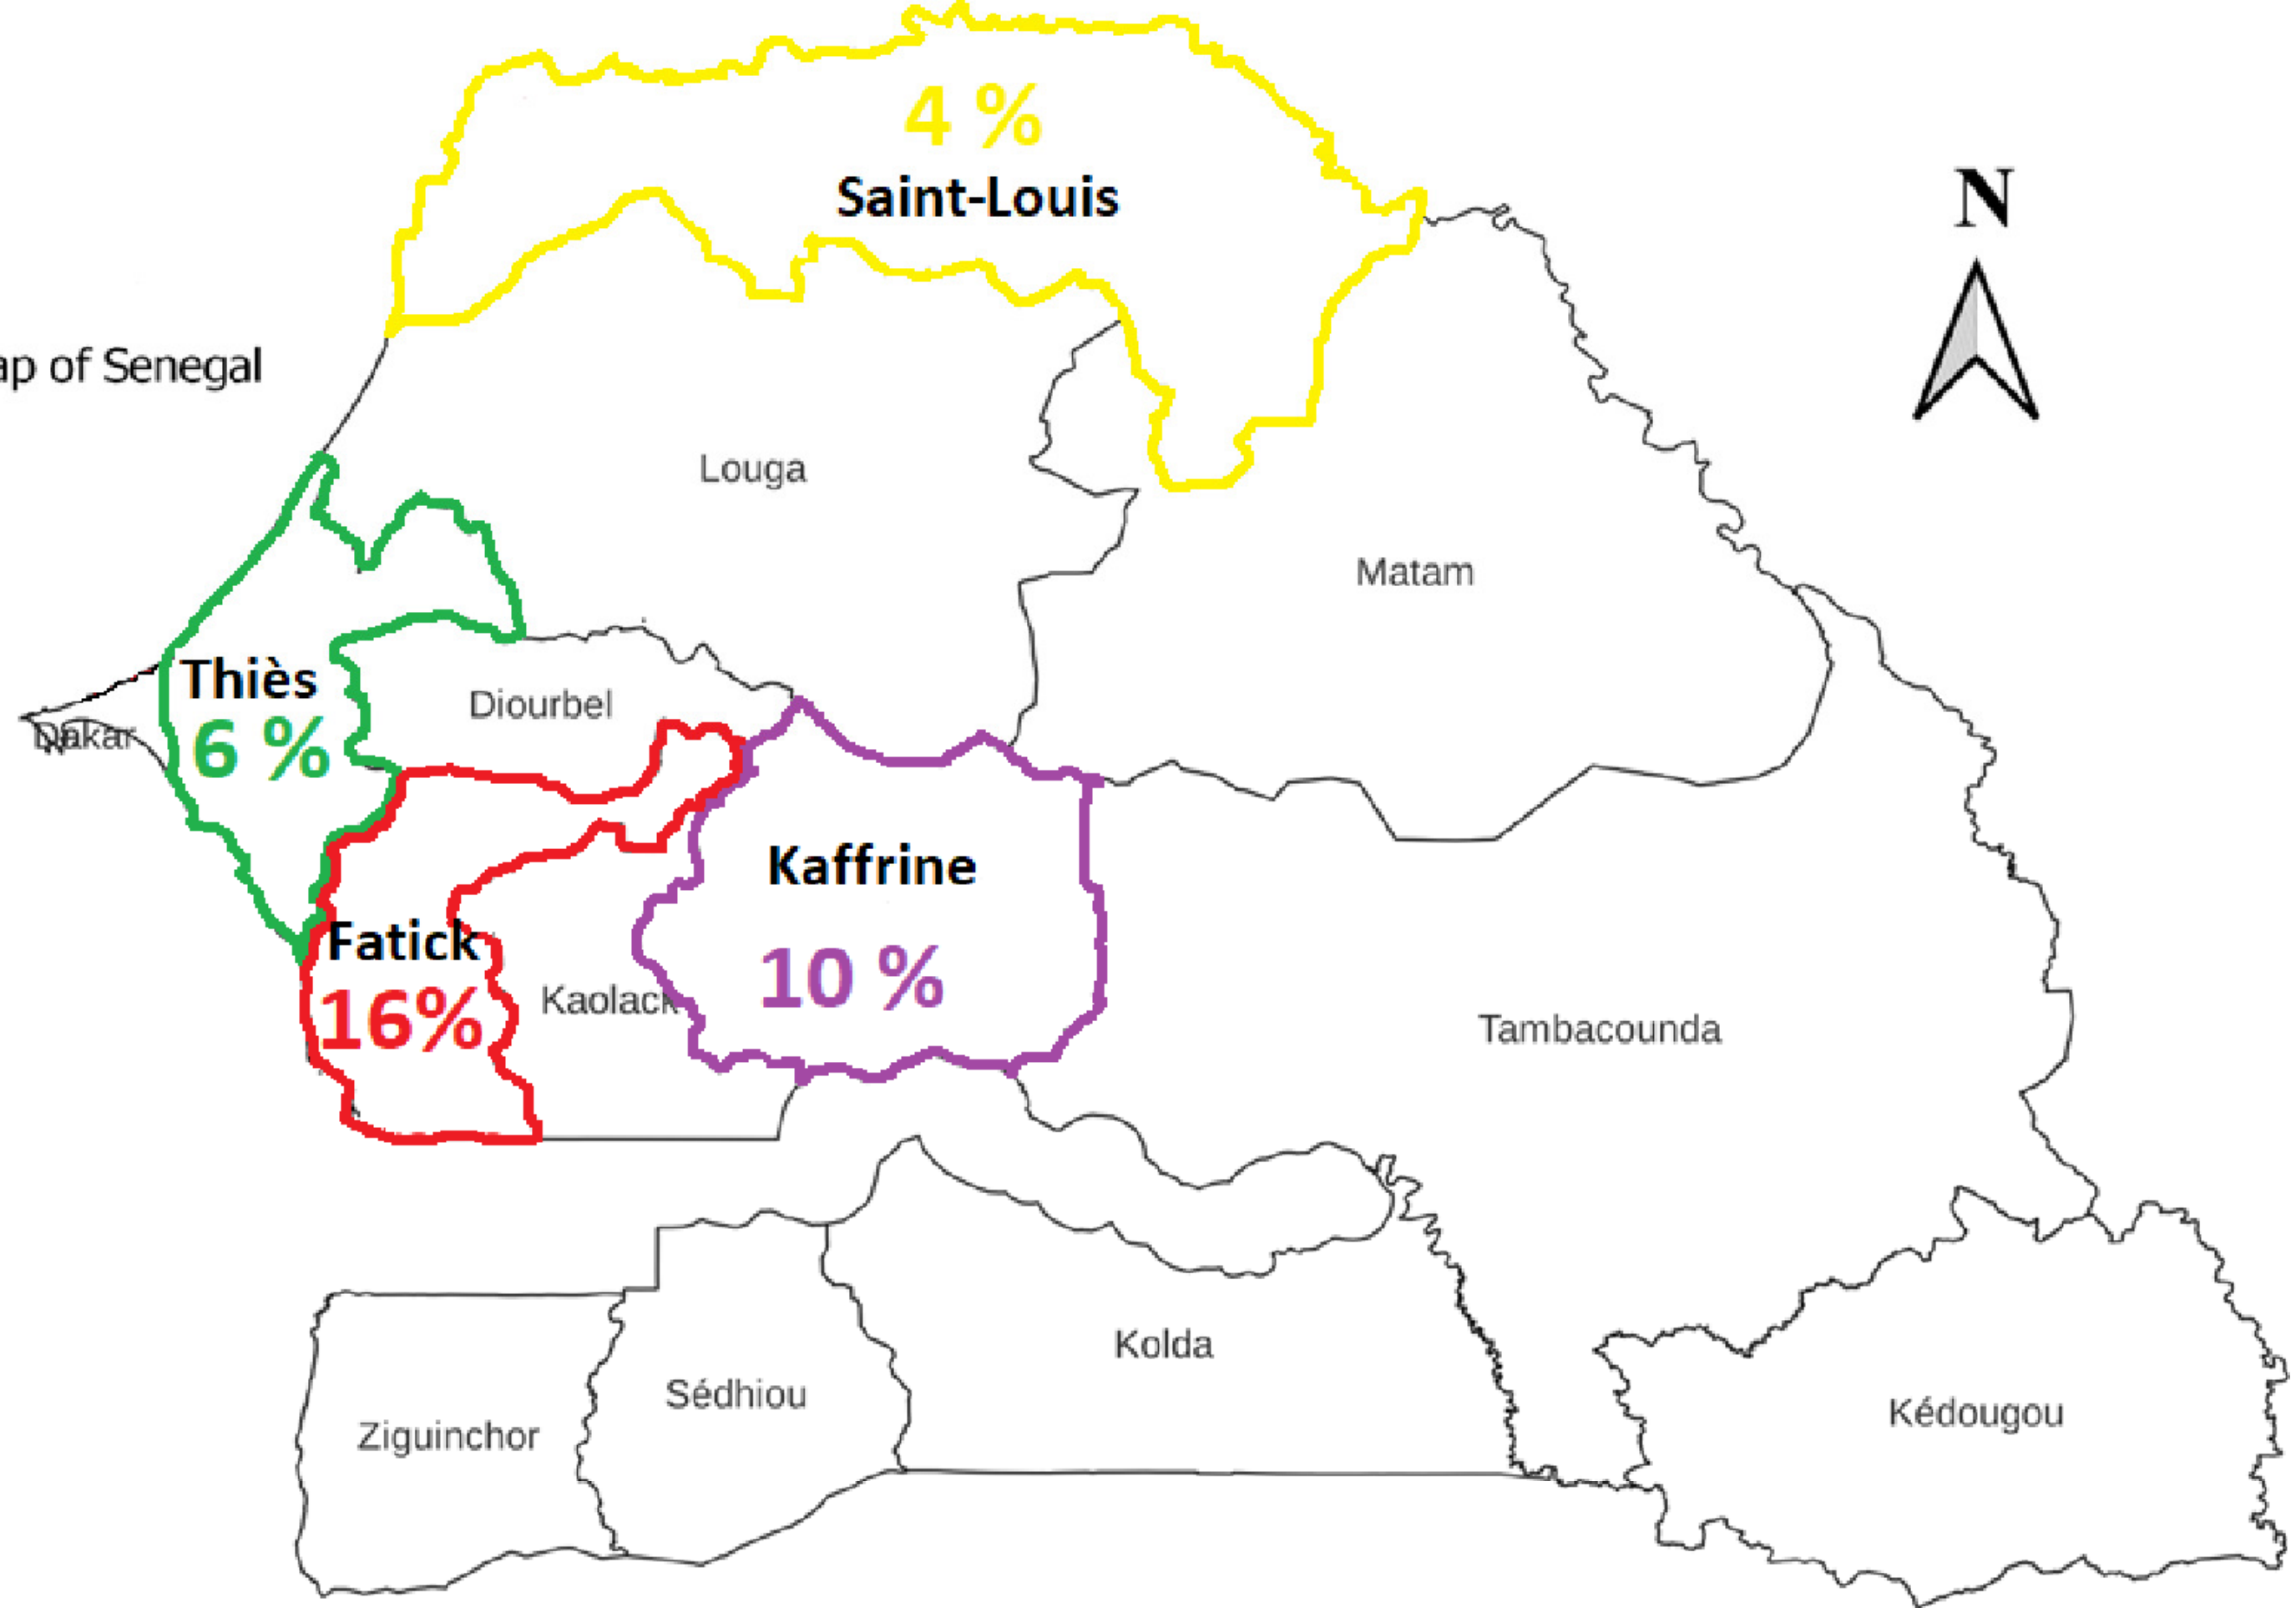

0 75 150 km

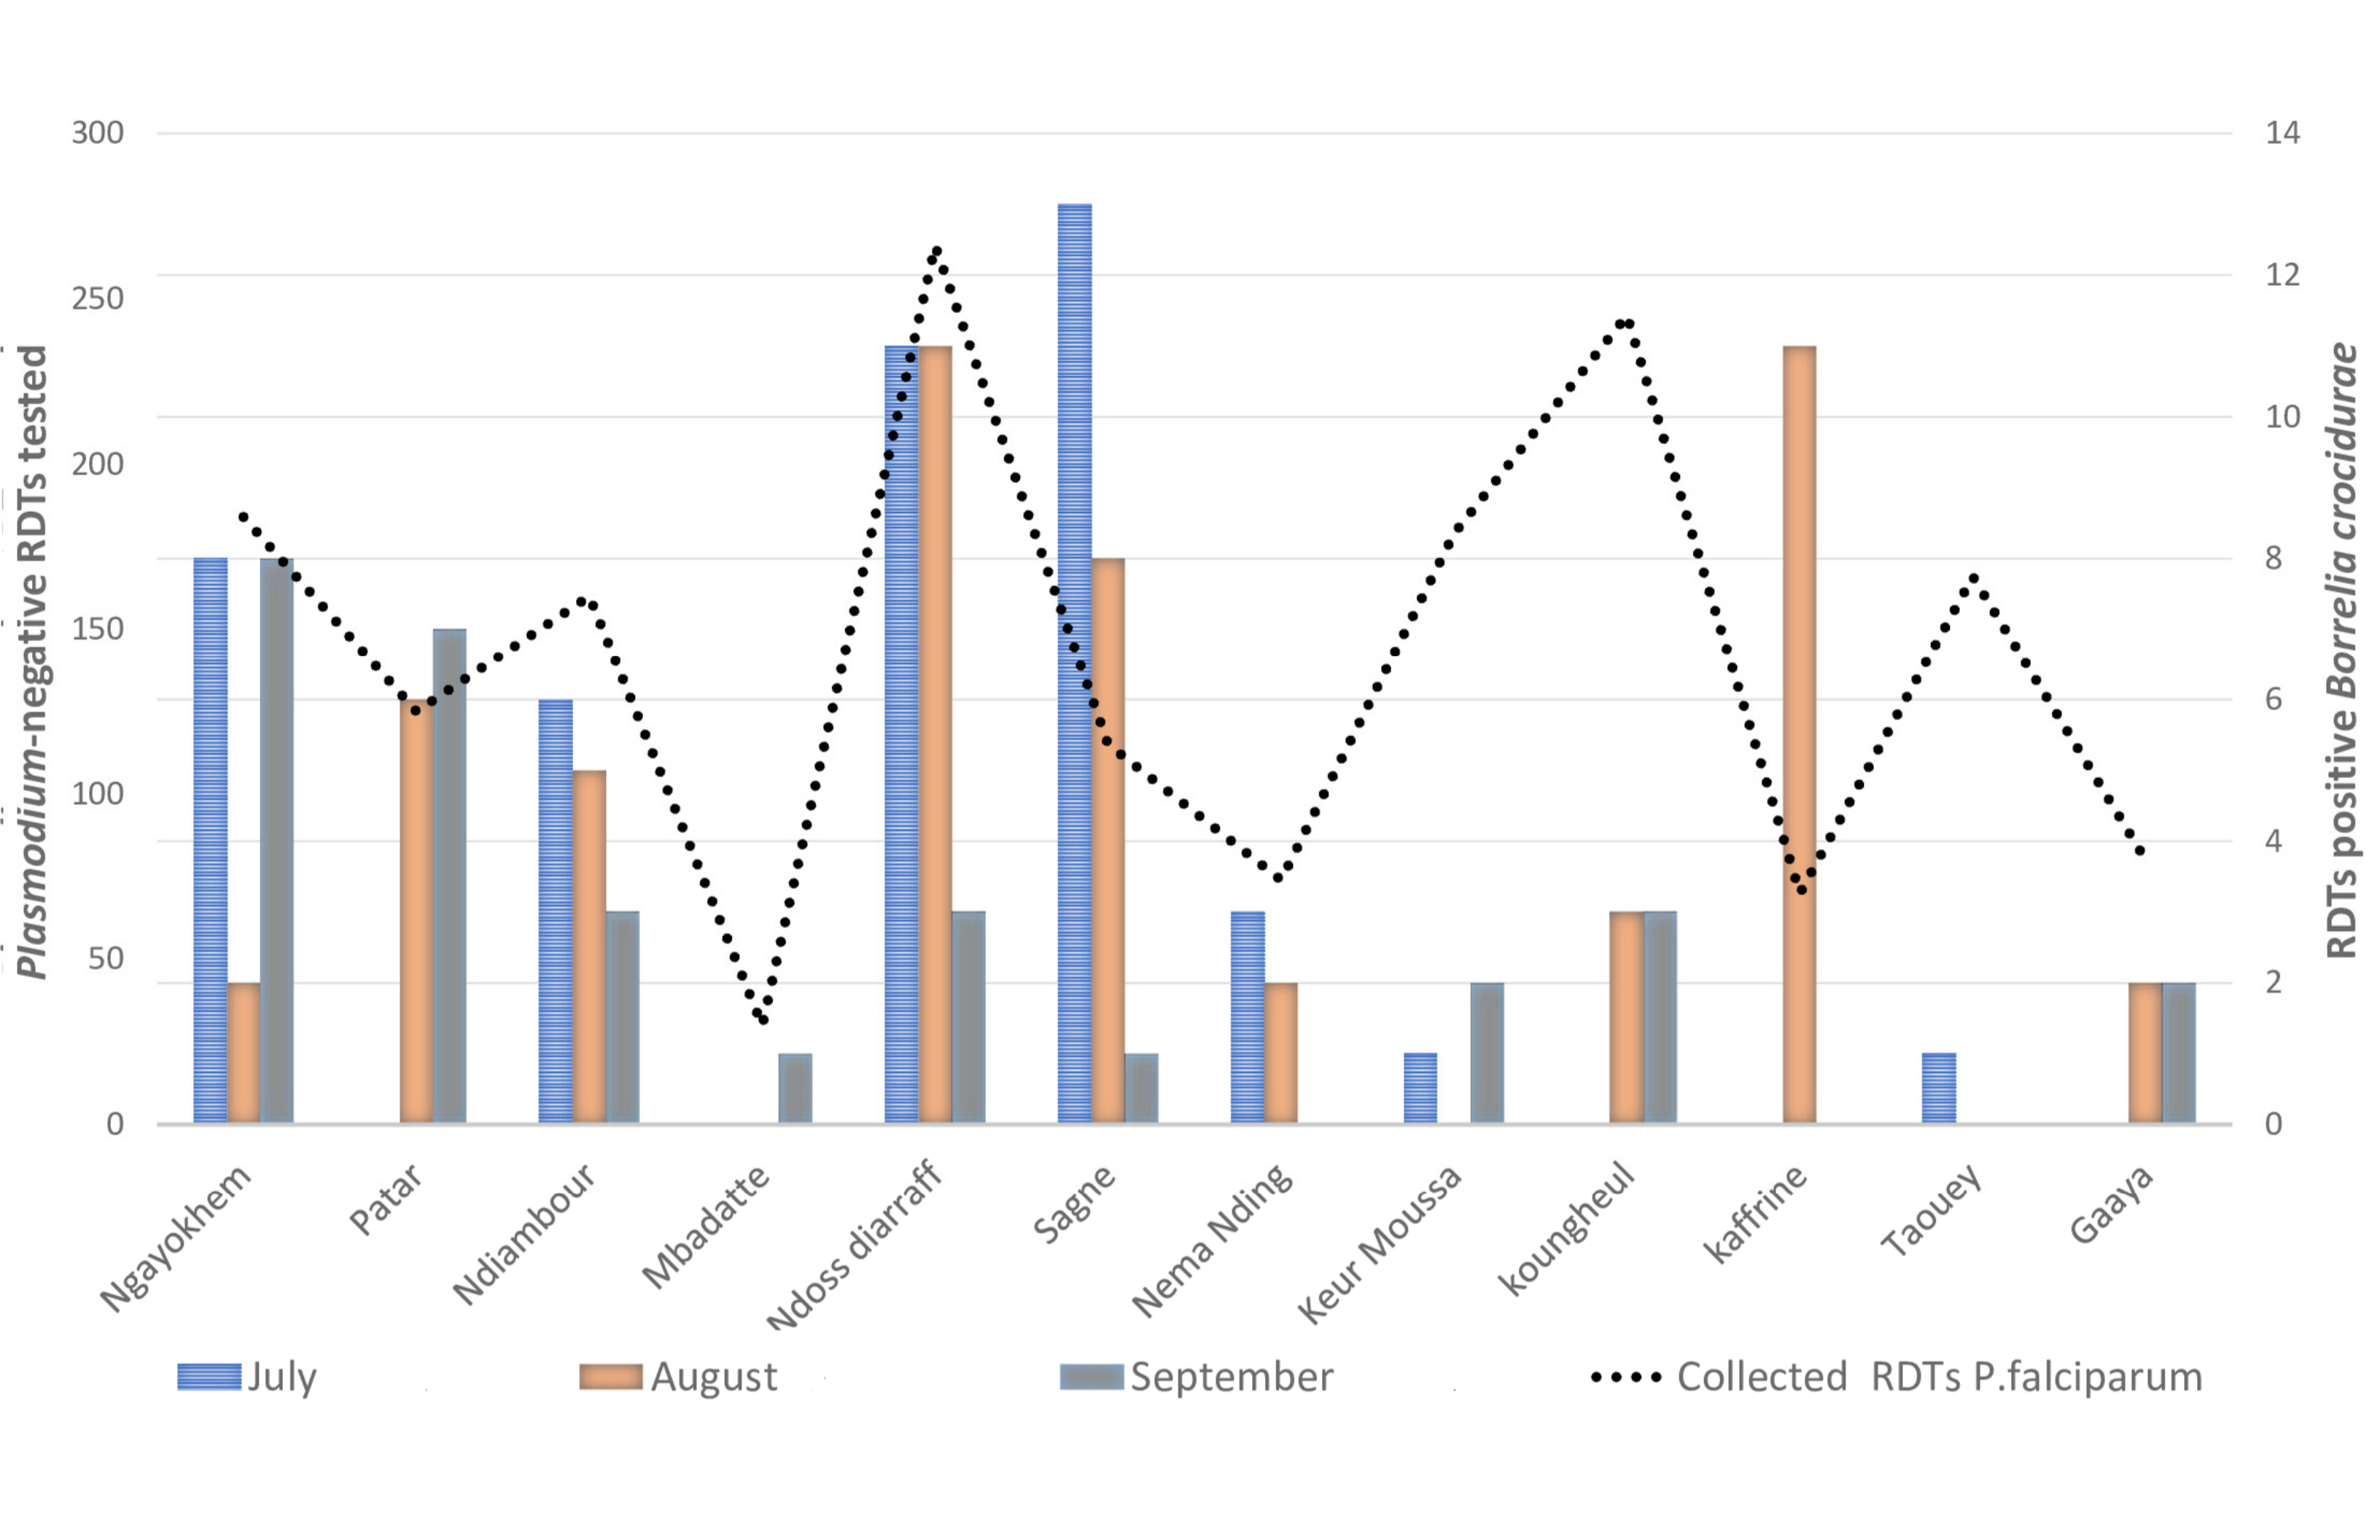

Supplementary Table 1: List of primers and probes of genes used for pathogen detection in this study

| System name               | Assay specificity        | Targeted gene | Primer sequences                                                                                                                                       | Reference |
|---------------------------|--------------------------|---------------|--------------------------------------------------------------------------------------------------------------------------------------------------------|-----------|
|                           | <i>Borrelia</i> sp.      | <i>ITS4</i>   | Bor_ITS4_F (5'-GGCTTCGGGTCTACCACATCTA-3')<br>Bor_ITS4_R (5'-CCGGGAGGGGAGTGAAATAG-3')<br>Bor_ITS4_P (6FAM-TGCAAAAGGCACGCCATCACC)                        | 38        |
|                           | <i>B. crocidurae</i>     | <i>GlpQ</i>   | Bcroci_glpQ_F (5'-CCTTGGATACCCCAAATCATC-3')<br>Bcroci_glpQ_R (5'-GGCAATGCATCAATTCTAAAC-3')<br>Bcroci_glpQ_P (6FAM-ATGGACAAATGACAGGTCTTAC –MGB)         | 6         |
| Real Time<br>Quantitative | Bartonella sp.           | <i>ITS2</i>   | Barto_ITS2_F (5'-GGGGCCGTAGCTCAGCTG-3')<br>Barto_ITS2_R (5'-TGAATATATCTTCTCTTCAATTC-3')<br>Barto_ITS2_P (6FAM-CGATCCCCTCCGGCTCCACCA)                   | 38        |
| PCR                       | Anaplasmatatacae         | <i>qANA</i>   | TtAna_F (5'-TGACAGCGTACCTTTTGCAT-3')<br>TtAna_R (5'-GTAACAGGTTCCGGTCCCA-3')<br>TtAna_P (6FAM-GGATTAGACCCGAAACCAAG)                                     | 38        |
|                           | <i>Coxiella burnetti</i> | <i>ISS11</i>  | CB_IS1111_0706F (5'-CAAGAAACGTATCGCTGTGGC-3')<br>CB_IS1111_0706R (5'-CACAGAGCCACCGTATGAATC-3')<br>CB_IS1111_0706P (6FAM-<br>CCGAGTTTCGAAACAATGAGGGCTG) | 38        |
|                           | <i>Rickettsia</i>        | <i>RKND</i>   | RKND03_F (5'-GTGAATGAAAGATTACACTATTTAT-3')<br>RKND03_R (5'-GTATCTTAGCAATCATTCTAATAGC-3')<br>RKND03_P (6FAM-CTATTATGCTTGCGGCTGTCGGTTC)                  | 38        |
| Standard<br>PCR           | <i>Borrelia</i> sp.      | <i>FlaB</i>   | B_F1 (5'-TAATACGTCAGCCATAAATGC-3')<br>B_R1 (5'-GCTCTTTGATCAGTTATCATTC-3')                                                                              | 34        |

Supplementary Table 2: Optimisation of malaria RDTs *P. falciparum* fragments using DNA extraction load.

| Sample tested                                                                                                        | Numbers of RDT tested | Ag detection strip | <i>Actin</i>                       |                                    |                                    | <i>Plasmodium</i>    |                                    | <i>Borrelia</i>                    |                                    |            |
|----------------------------------------------------------------------------------------------------------------------|-----------------------|--------------------|------------------------------------|------------------------------------|------------------------------------|----------------------|------------------------------------|------------------------------------|------------------------------------|------------|
|                                                                                                                      |                       |                    | RDT frag S<br><b>Pos</b> (Ct mean) | RDT frag N<br><b>Pos</b> (Ct mean) | RDT frag F<br><b>Pos</b> (Ct mean) | <b>Pos</b> (Ct mean) | RDT frag S<br><b>Pos</b> (Ct mean) | RDT frag N<br><b>Pos</b> (Ct mean) | RDT frag F<br><b>Pos</b> (Ct mean) |            |
| <b>1) Field SD BIOLINE malaria RDT <i>P. falciparum</i> with positive and negative band test</b>                     |                       |                    |                                    |                                    |                                    |                      |                                    |                                    |                                    |            |
| Positive <i>Plasmodium</i>                                                                                           | 10                    | pos                | 10/10                              | (25.30)                            |                                    | 7/10                 | (33.29)                            | **                                 | **                                 | **         |
| Negative <i>Plasmodium</i>                                                                                           | 10                    | neg                | 9/10                               | 25.73)                             |                                    | 0/10                 | (N/A)                              | **                                 | **                                 | **         |
| <b>2) Black SD BIOLINE malaria RDTs <i>P. falciparum</i> tested with <i>Borrelia</i>-positive and negative blood</b> |                       |                    |                                    |                                    |                                    |                      |                                    |                                    |                                    |            |
| <i>Borrelia</i> negative                                                                                             | 10                    | neg                | 9/10 (31.24)                       | 9/10 (31.34)                       | 2/10 (33.13)                       | **                   | 0/10 (N/A)                         | 0/10 (N/A)                         | 0/10 (N/A)                         | 0/10 (N/A) |
| <i>Borrelia</i> positive                                                                                             | 25                    | neg                | 25/25 (30.07)                      | 25/25 (29.61)                      | 7/25 (35.10)                       | **                   | 25/25 (25.36)                      | 25/25 (24.01)                      | 24/25 (32.20)                      |            |

- Antigen (Ag) detection is considered positive (pos) if both control and test *P. falciparum* bands are visible and negative (neg) if only the control band is visible (Supplementary Figure 1).

- DNA detection by qPCR on malaria RDTs *P. falciparum* is expressed as cycle threshold (Ct) values and N/A is defined as a negative result with no assigned Ct value.

- The malaria RDTs *P. falciparum* fragments (frag) used were the blood deposit portion (S), the nitrocellulose strip (N) and the final absorbent paper (F) (Supplementary Figure 1).

\*\* Malaria RDT *P. falciparum* DNA not tested.
